# Supplementary material for: Enhanced nucleation of polypropylene by metal–organic frameworks (MOFs) based on aluminium dicarboxylates: influence of structural features
Source: Royal Society of Chemistry journal article supplement (doi:10.1039/c5ra22764j), 2015-12-21
Supplement: c5ra22764j1.pdf [file c5ra22764j1.pdf]

*Electronic Supplementary Information for*

**Enhanced Nucleation of Polypropylene by Metal Organic Frameworks (MOFs)  
based on Aluminium Dicarboxylates: Influence of Structural Features**

Mohan Raj Mani,<sup>ab</sup> Ramesh Chellaswamy,<sup>\*ab</sup> Yogesh N. Marathe<sup>ab</sup>

and Vijayamohanan K. Pillai<sup>bc</sup>

<sup>a</sup>Polymer Science and Engineering Division, Polymers and Advanced Materials Laboratory,  
CSIR-National Chemical Laboratory, Dr. Homi Bhabha Road, Pune-411 008, India.

<sup>b</sup>Academy of Scientific and Innovative Research (AcSIR) New Delhi 110 025, India

<sup>c</sup>CSIR-Central Electrochemical Research Institute, Karaikudi-630006, India.

Email: [c.ramesh@ncl.res.in](mailto:c.ramesh@ncl.res.in)

| <b>Section</b> | <b>Name</b>                                                                                                                                               | <b>Page No.</b> |
|----------------|-----------------------------------------------------------------------------------------------------------------------------------------------------------|-----------------|
| <b>S1</b>      | DSC melt crystallization thermograms (cooling cycle) of pristine iPP and iPP nucleated with 2000ppm of various nucleating agents (indicated in the graph) | 2               |
| <b>S2</b>      | WAXS patterns of iPP (unnucleated) and nucleated with Al-dicarboxylates (indicated in the graph)                                                          | 3               |
| <b>S3</b>      | FT-IR spectra of Al-dicarboxylates (indicated in the graph)                                                                                               | 4               |
| <b>S4</b>      | Nitrogen sorption-desorption isotherm of Al-FumA                                                                                                          | 5               |
| <b>S5</b>      | Nitrogen sorption-desorption isotherm of Al-SucA                                                                                                          | 5               |
| <b>S6</b>      | Thermogravimetric analysis (TGA) of Al-dicarboxylates (indicated in the graph)                                                                            | 6               |
| <b>S7</b>      | Powder X-ray pattern of MOFs based on Al, Cr & Zr with suberates.                                                                                         | 6               |
| <b>S8</b>      | Thermogravimetric analysis of Al, Cr and Zr suberates.                                                                                                    | 7               |

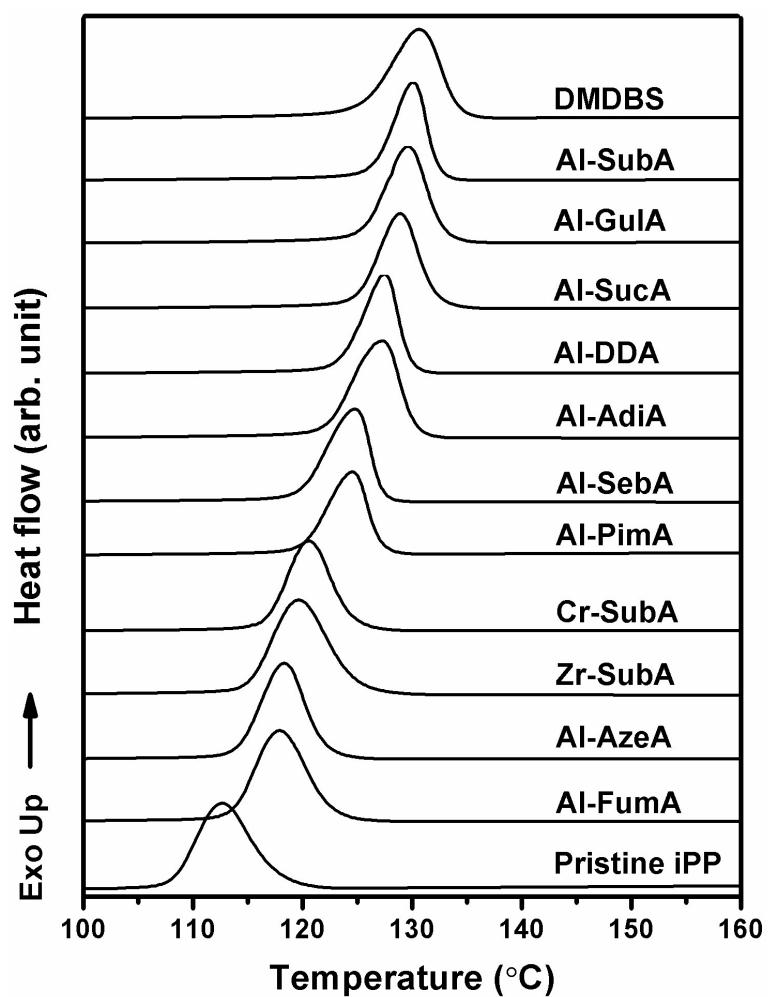

**Figure S1.** DSC melt crystallization thermograms (cooling cycle) of pristine iPP and iPP nucleated with 2000ppm of various nucleating agents (indicated in the graph).

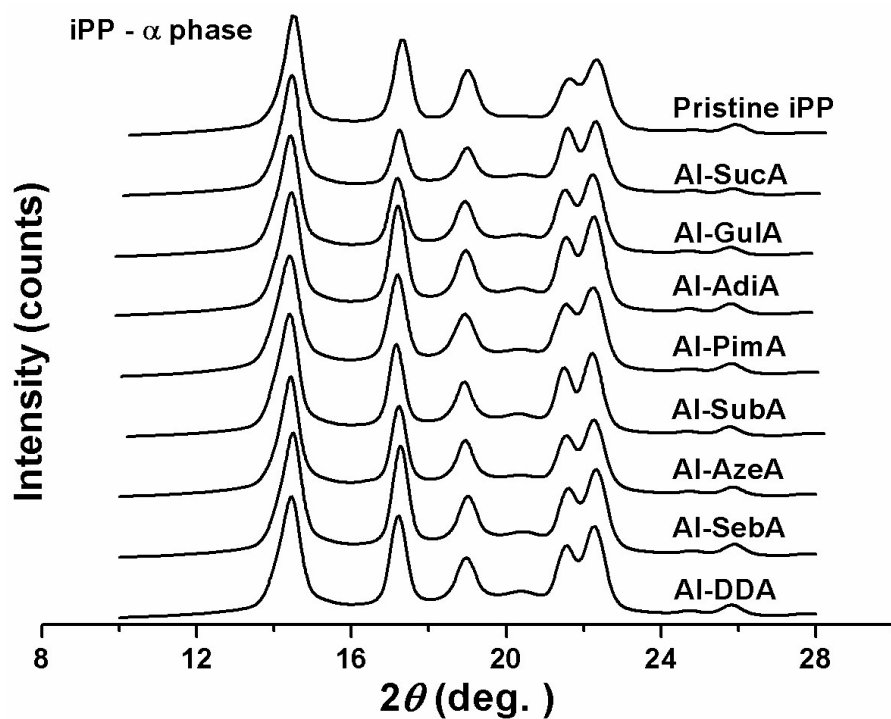

**Figure S2.** WAXS patterns of iPP (unnucleated) and nucleated with Al-dicarboxylates (indicated in the graph).

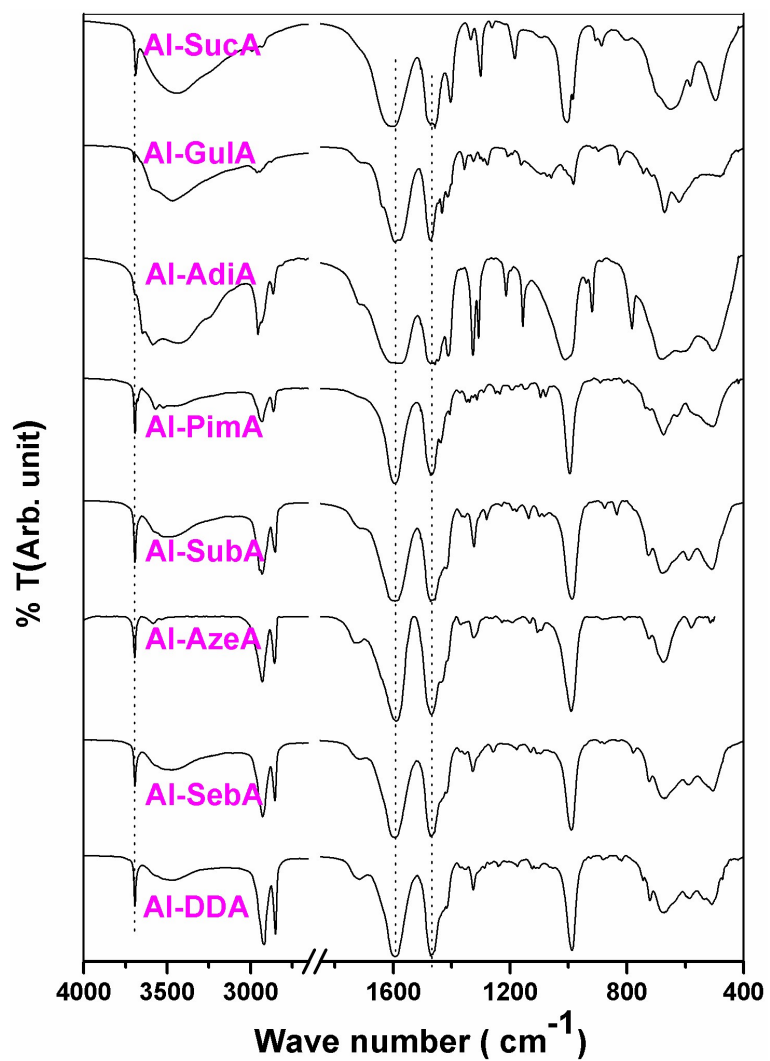

**Figure S3.** FT-IR spectra of Al-dicarboxylates (indicated in the graph).

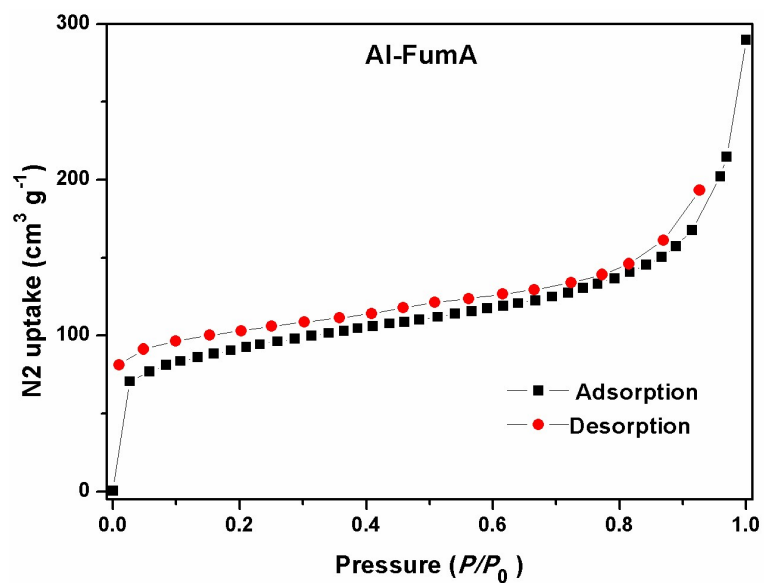

Figure S4. Nitrogen sorption-desorption isotherm of Al-FumA

S5

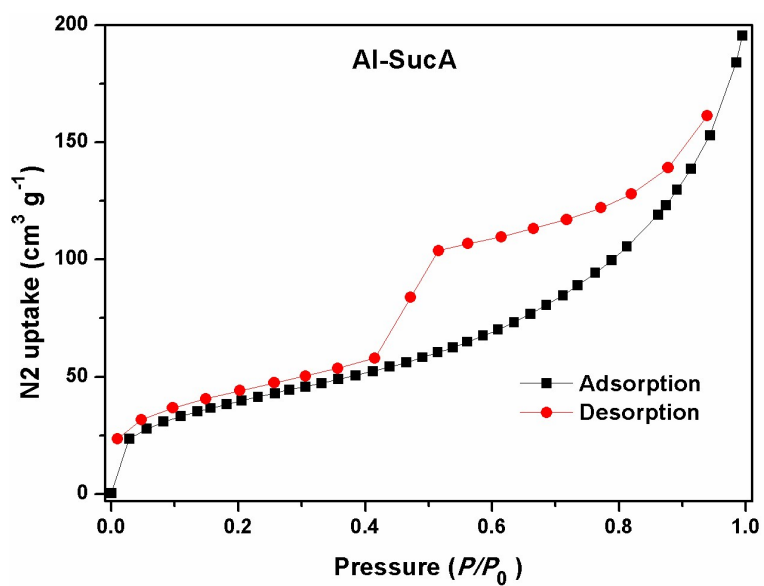

Figure S5. Nitrogen sorption-desorption isotherm of Al-SucA

S6

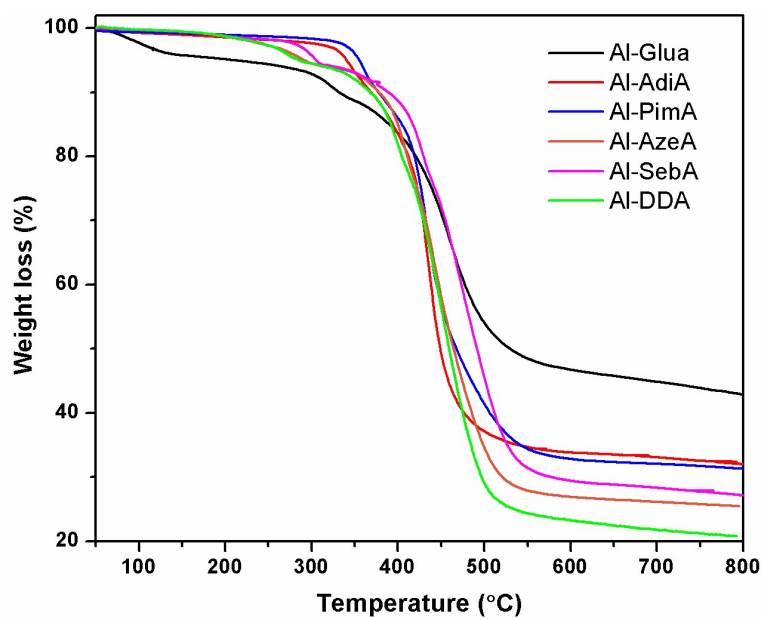

**Figure S6.** Thermogravimetric analysis (TGA) of Al-dicarboxylates (indicated in the graph)

**S7**

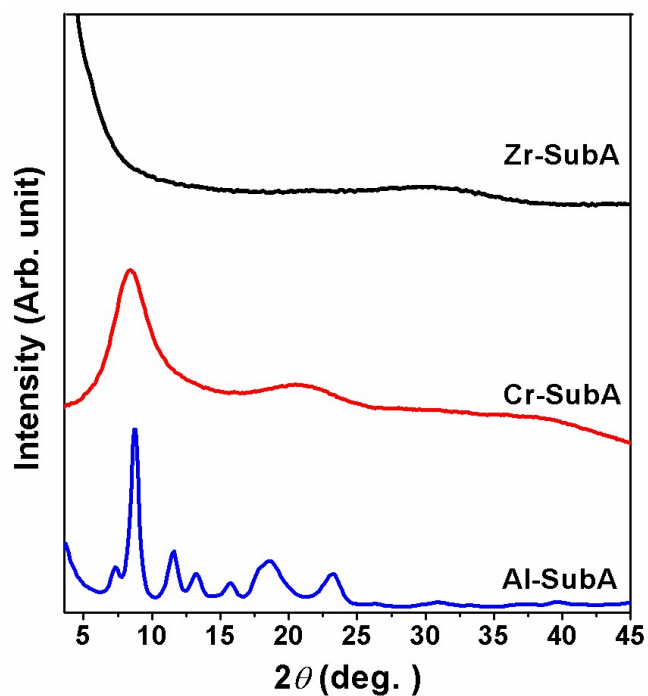

**Figure S7.** Powder X-ray pattern of MOFs based on Al, Cr & Zr with suberates.

**S8**

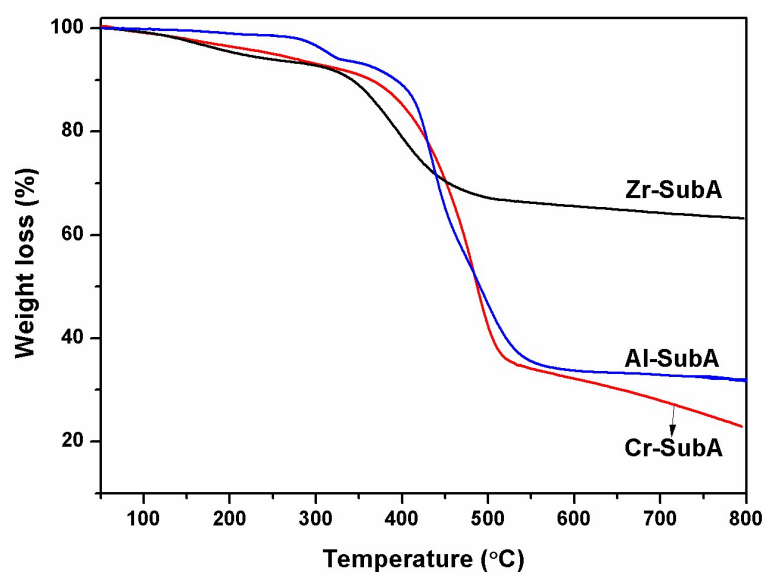

**Figure S8.** Thermogravimetric analysis of Al, Cr and Zr substrates.
